# Supplementary material for: Gene fusions and oncogenic mutations in MLH1 deficient and BRAFV600E wild-type colorectal cancers
Source: Springer Nature journal article supplement (doi:10.1007/s00428-022-03302-x), 2022-03-03
Supplement: MOESM1 [file 20188870]

**Supplementary Information**

for

**Gene fusions and oncogenic mutations in *MLH1* deficient and *BRAFV600E* wild-type colorectal cancers**

Iris Ukkola<sup>1,2</sup>, Pirjo Nummela<sup>2</sup>, Mia Kero<sup>1</sup>, Hanna Tammio<sup>3</sup>, Jenni Tuominen<sup>4</sup>, Veli Kairisto<sup>4</sup>, Markku Kallajoki<sup>5</sup>, Caj Haglund<sup>6,7</sup>, Päivi Peltomäki<sup>8</sup>, Soili Kytölä<sup>3</sup> and Ari Ristimäki<sup>1,2\*</sup>

<sup>1</sup>Department of Pathology, HUSLAB, HUS Diagnostic Center, Helsinki University Hospital and University of Helsinki, Helsinki, Finland

<sup>2</sup>Applied Tumor Genomics Research Program, Research Programs Unit, Faculty of Medicine, University of Helsinki, Helsinki, Finland

<sup>3</sup>Department of Genetics, HUSLAB, HUS Diagnostic Center, Helsinki University Hospital and University of Helsinki, Helsinki, Finland

<sup>4</sup>Department of Genomics, Laboratory of Molecular Haematology and Pathology, Turku University Central Hospital, Turku, Finland

<sup>5</sup>Department of Pathology, University of Turku and Turku University Hospital, Turku, Finland

<sup>6</sup>Department of Surgery, University of Helsinki and Helsinki University Hospital, Helsinki, Finland

<sup>7</sup>Translational Cancer Medicine Research Program, Research Programs Unit, Faculty of Medicine, University of Helsinki, Helsinki, Finland

<sup>8</sup>Department of Medical and Clinical Genetics, University of Helsinki, Helsinki, Finland

**A**

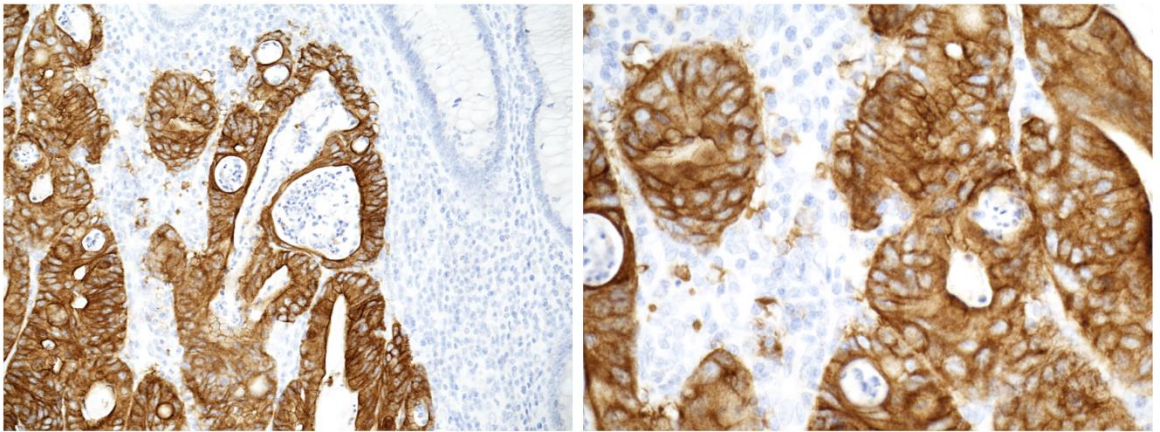

**B**

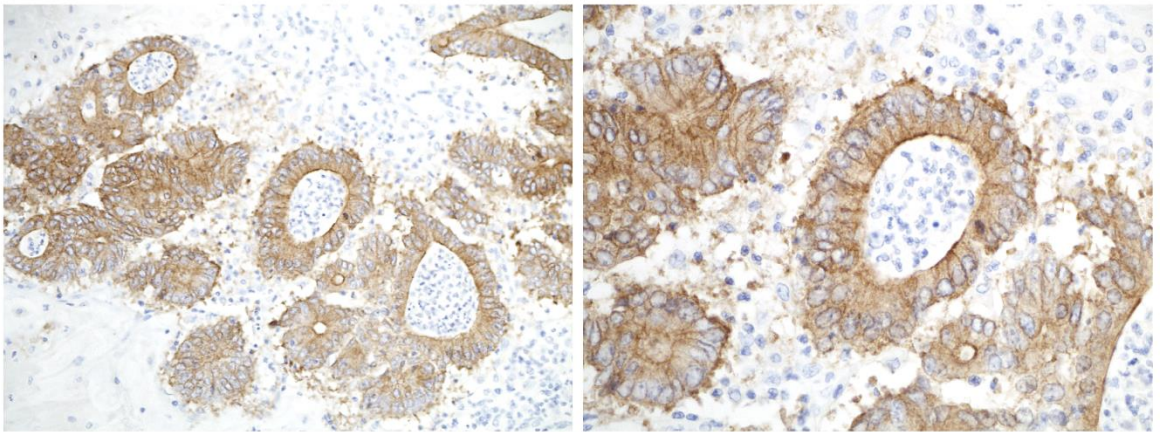

**C**

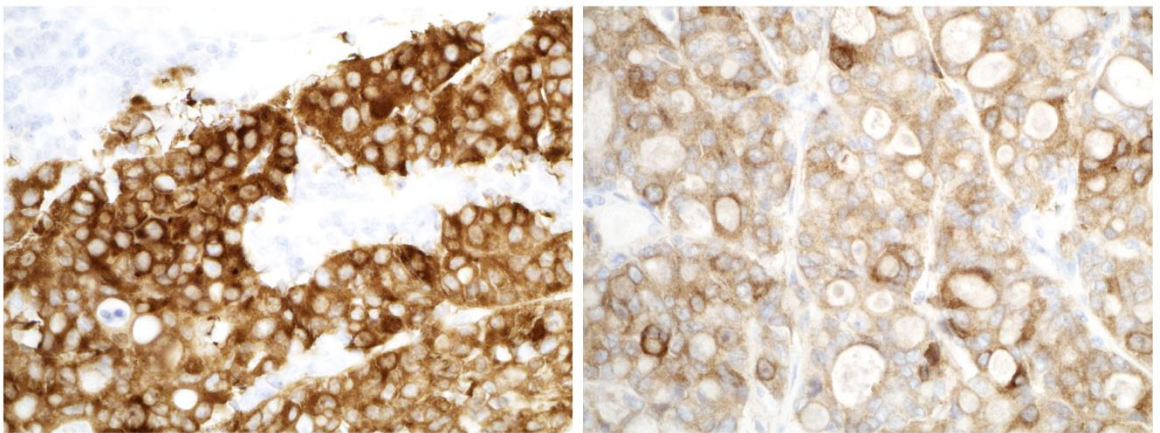

**D**

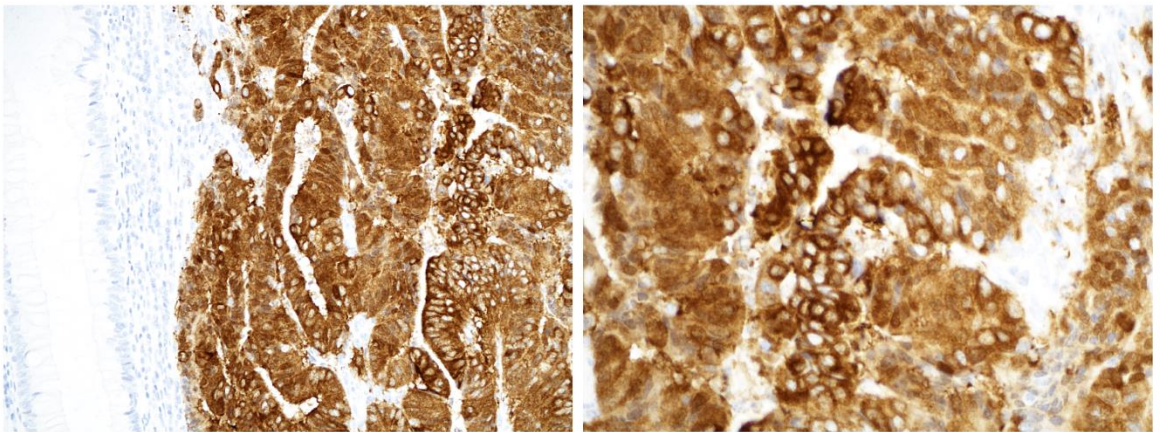



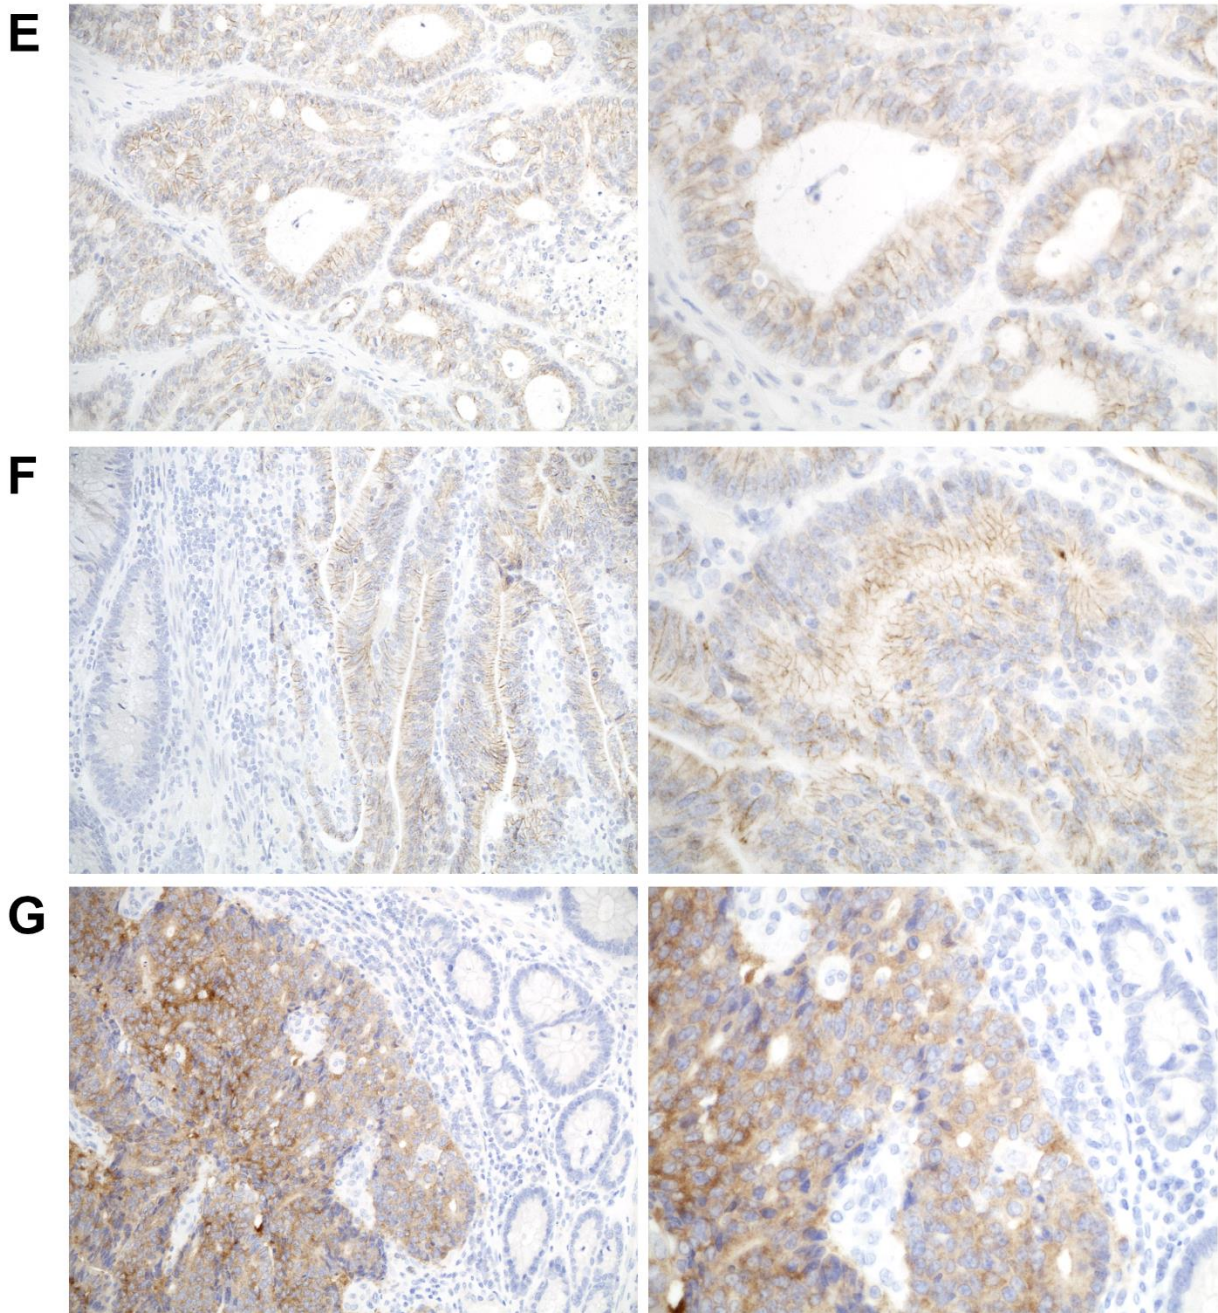

**Supplementary Figure S1.** Pan-TRK (clone EPR17341) immunostaining patterns in CRC samples. (A) Strong cytoplasmic staining with moderate membranous staining (Case 19; *TPM3::NTRK1*). (B) Moderate cytoplasmic staining with moderate membranous staining (Case 52; *TPM3::NTRK1*). (C) Moderate cytoplasmic staining with perinuclear staining (Case 29; *LMNA::NTRK1*). (D) Strong cytoplasmic staining with perinuclear staining (Case 35; *LMNA::NTRK1*). (E) Weak cytoplasmic staining with moderate membranous staining (Case 25; *PLEKHA6::NTRK1*). (F) Weak cytoplasmic staining with moderate membranous staining (Case 50; *PLEKHA6::NTRK1*). (G) Moderate cytoplasmic staining (Case 59; *IRF2BP2::NTRK1*). Original magnification x200 on the left side and x400 on the right.



**A**

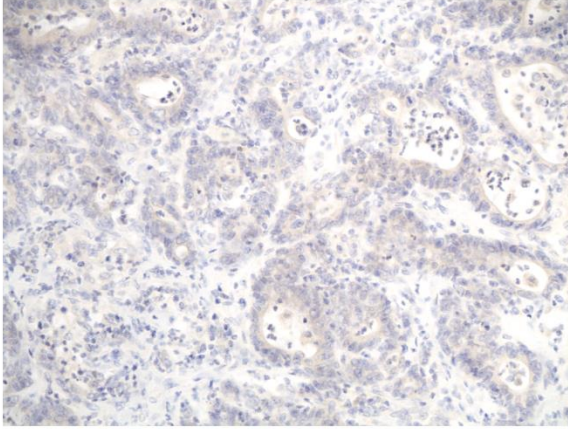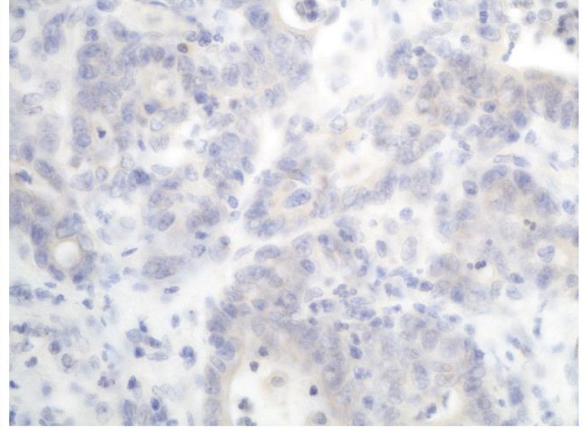

**B**

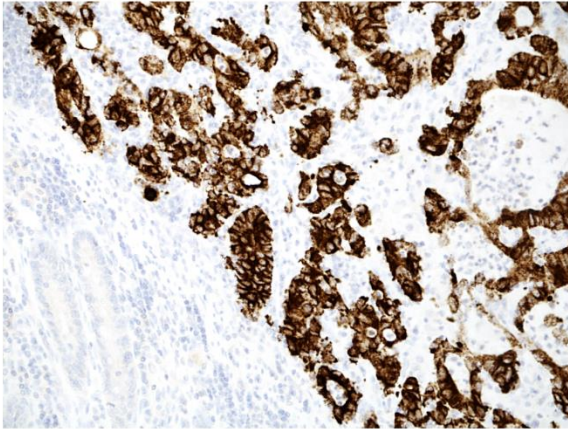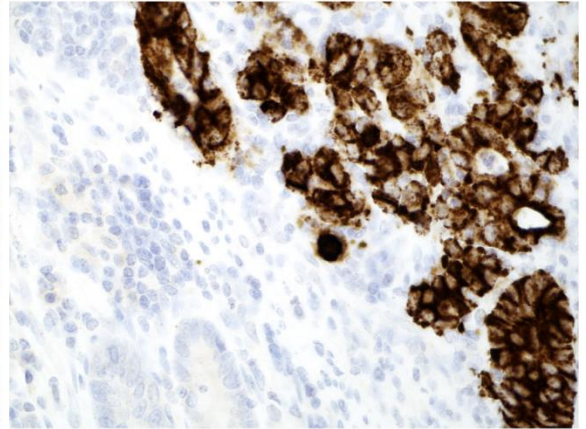

**C**

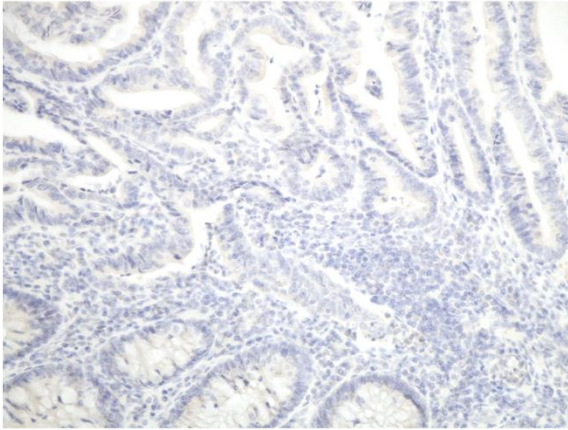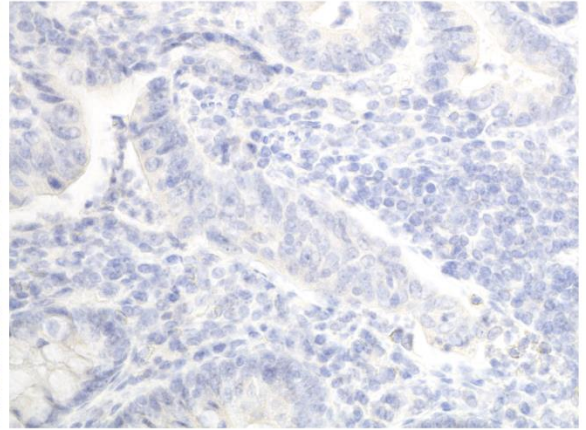

**D**

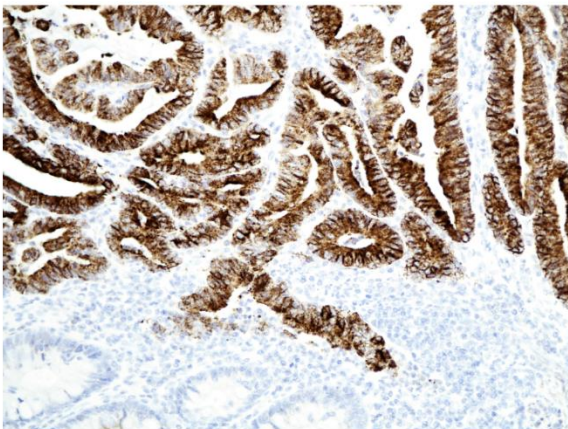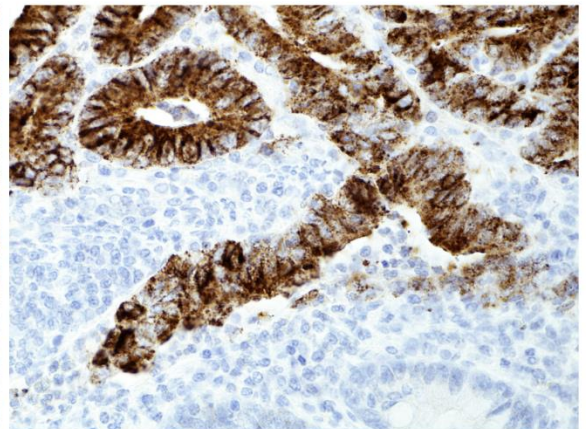

**Supplementary Figure S2.** ALK (clone 5A4) and pan-TRK (clone EPR17341) immunostaining patterns in CRC samples. **(A)** Weak cytoplasmic staining in pan-TRK IHC (Case 12; *EML4::ALK*). **(B)** Strong cytoplasmic staining in ALK IHC (Case 12; *EML4::ALK*). **(C)** Negative Pan-TRK IHC (Case 16; *EML4::ALK*). **(D)** Strong cytoplasmic staining in ALK IHC (Case 16; *EML4::ALK*). Original magnification x200 on the left side and x400 on the right.

**Supplementary Table S1.** Reference sequences used in the NGS fusion analyses

|                 | <b>FusionPlex Lung v2 NGS (GRCh37)</b> |                | <b>FusionPlex CTL NGS (GRCh37)</b> | <b>TruSight NGS (GRCh38)</b>    |
|-----------------|----------------------------------------|----------------|------------------------------------|---------------------------------|
| <i>AGAP3</i>    | NM_031946.6                            | <i>IRF2BP2</i> | NM_182972.2                        | NM_182972.3                     |
| <i>ALK</i>      | NM_004304.4                            | <i>LMNA</i>    | NM_005572.3 (10 exons, 572 AAs)    | NM_170707.4 (12 exons, 664 AAs) |
| <i>BRAF</i>     | NM_004333.4                            | <i>NTRK1</i>   | NM_002529.3                        | NM_002529.4                     |
| <i>CCDC6</i>    | NM_005436.4                            | <i>PLEKHA6</i> | NM_014935.4                        | NM_014935.5                     |
| <i>EML4</i>     | NM_019063.4                            | <i>TPM3</i>    | NM_153649.3 (8 exons, 248 AAs)     | NM_152263.4 (10 exons, 285 AAs) |
| <i>IRF2BP2</i>  | NM_182972.2                            |                |                                    |                                 |
| <i>LMNA</i>     | NM_005572.3 (10 exons, 572 AAs)        |                |                                    |                                 |
| <i>LMTK2</i>    | NM_014916.3                            |                |                                    |                                 |
| <i>MKRN1</i>    | NM_013446.3                            |                |                                    |                                 |
| <i>NCOA4</i>    | NM_005437.3                            |                |                                    |                                 |
| <i>NTRK1</i>    | NM_002529.3                            |                |                                    |                                 |
| <i>PLEKHA6</i>  | NM_014935.4                            |                |                                    |                                 |
| <i>RET</i>      | NM_020630.4                            |                |                                    |                                 |
| <i>STARD3NL</i> | NM_032016.3                            |                |                                    |                                 |
| <i>TPM3</i>     | NM_153649.3 (8 exons, 248 AAs)         |                |                                    |                                 |
| <i>TRIM24</i>   | NM_003852.3                            |                |                                    |                                 |

CTL: Comprehensive Thyroid and Lung, GRC: Genome Reference Consortium, NGS: next-generation sequencing

**Supplementary Table S2.** Idylla and MS-MLPA results in 62 deficient MLH1/*BRAF*V600E wild-type colorectal cancers

| Case            | Tumor cells % | Tissue area mm <sup>2</sup> | Idylla GeneFusion | <i>ALK</i> specific | <i>ALK</i> imb | <i>ROS1</i> specific | <i>ROS1</i> imb | <i>RET</i> specific | <i>RET</i> imb | <i>MET</i> exon 14 skipping | <i>NTRK1</i> imb | <i>NTRK2</i> imb | <i>NTRK3</i> imb | Idylla KRAS | Idylla NRAS-BRAF | <i>MLH1</i> ph |
|-----------------|---------------|-----------------------------|-------------------|---------------------|----------------|----------------------|-----------------|---------------------|----------------|-----------------------------|------------------|------------------|------------------|-------------|------------------|----------------|
| 1               | 70            | 150                         | not detected      |                     |                |                      |                 |                     |                |                             |                  |                  |                  | Q61R/L      |                  | yes            |
| 2 <sup>a</sup>  | 40            | 280                         | not detected      |                     |                |                      |                 |                     |                |                             |                  |                  |                  | A146P/T/V   |                  | no             |
| 3               | 30            | 160                         | not detected      |                     |                |                      |                 |                     |                |                             |                  |                  |                  | G12D        |                  | no             |
| 4               | 50            | 150                         | not detected      |                     |                |                      |                 |                     |                |                             |                  |                  | invalid          |             |                  | yes            |
| 5               | 80            | 70                          | not detected      |                     |                |                      |                 |                     |                |                             |                  |                  |                  | Q61K        |                  | yes            |
| 6               | 60            | 100                         | not detected      |                     |                |                      |                 |                     |                |                             |                  |                  |                  |             |                  | no             |
| 7               | 60            | 250                         | not detected      |                     |                |                      |                 |                     |                |                             |                  |                  | invalid          | G12D        |                  | yes            |
| 8               | 50            | 100                         | not detected      |                     |                |                      |                 |                     |                |                             |                  |                  | invalid          | G12D        |                  | yes            |
| 9               | 40            | 300                         | not detected      |                     |                |                      |                 |                     |                |                             |                  |                  |                  |             |                  | no             |
| 10              | 40            | 140                         | not detected      |                     |                |                      |                 |                     |                |                             |                  |                  |                  |             |                  | yes            |
| 11              | 50            | 270                         | not detected      |                     |                |                      |                 |                     |                |                             |                  |                  |                  |             |                  | NA             |
| 12              | 60            | 300                         | detected          |                     | detected       |                      |                 |                     |                |                             |                  |                  |                  |             |                  | yes            |
| 13              | 50            | 120                         | not detected      |                     |                |                      |                 |                     |                |                             |                  |                  |                  |             |                  | yes            |
| 14              | 50            | 140                         | not detected      |                     |                |                      |                 |                     |                |                             |                  |                  |                  | G12D        |                  | yes            |
| 15 <sup>b</sup> | 50            | 280                         | invalid           | invalid             |                | invalid              |                 | invalid             |                | invalid                     | invalid          | invalid          | invalid          |             |                  | yes            |
| 16              | 30            | 50                          | detected          | detected            |                |                      |                 |                     |                |                             |                  |                  |                  |             |                  | yes            |
| 17              | 70            | 70                          | not detected      |                     |                |                      |                 |                     |                |                             |                  |                  | invalid          | G12V        |                  | yes            |
| 18              | 70            | 300                         | not detected      |                     |                |                      |                 |                     |                |                             |                  |                  | invalid          |             | Q61R             | yes            |
| 19              | 40            | 60                          | detected          |                     |                |                      |                 |                     |                |                             | detected         |                  |                  |             |                  | yes            |
| 20              | 70            | 40                          | not detected      |                     |                |                      |                 |                     |                |                             |                  |                  |                  |             |                  | yes            |
| 21              | 80            | 30                          | not detected      |                     |                |                      |                 |                     |                |                             |                  |                  | invalid          |             |                  | no             |



|                 |    |     |              |         |         |         |         |         |         |         |          |         |         |  |      |     |
|-----------------|----|-----|--------------|---------|---------|---------|---------|---------|---------|---------|----------|---------|---------|--|------|-----|
| 52              | 50 | 150 | detected     |         |         |         |         |         |         |         | detected |         |         |  |      | yes |
| 53              | 60 | 300 | not detected |         |         |         |         |         |         |         |          |         |         |  |      | yes |
| 54              | 70 | 75  | not detected |         |         |         |         |         |         |         |          |         |         |  |      | yes |
| 55 <sup>a</sup> | 50 | 150 | not detected |         |         |         |         |         |         |         |          |         | invalid |  | G12C | no  |
| 56 <sup>b</sup> | 70 | 200 | invalid      | invalid | invalid | invalid | invalid | invalid | invalid | invalid | invalid  | invalid | invalid |  | Q61R | yes |
| 57              | 40 | 290 | not detected |         |         |         |         |         |         |         |          |         |         |  |      | yes |
| 58              | 20 | 120 | not detected |         |         |         |         |         |         |         |          |         |         |  |      | no  |
| 59              | 50 | 100 | detected     |         |         |         |         |         |         |         | detected |         |         |  |      | yes |
| 60              | 40 | 150 | not detected |         |         |         |         |         |         |         |          |         |         |  | G12D | yes |
| 61              | 40 | 100 | not detected |         |         |         |         |         |         |         |          |         |         |  |      | yes |
| 62 <sup>b</sup> | 50 | 300 | invalid      | invalid | invalid | invalid | invalid | invalid | invalid | invalid | invalid  | invalid | invalid |  | G12V | no  |

imb: expression imbalance, MS-MLPA: methylation-specific multiplex ligation-dependent probe amplification, ph: promoter hypermethylation

<sup>a</sup>The first Idylla analysis was invalid (RNA amplification improper/inappropriate). Re-analysis was done using the same tissue block, and the repetition resulted not detected.

<sup>b</sup>The first Idylla analysis was invalid (RNA amplification improper/inappropriate). Re-analysis was done using the same tissue block, and the result remained as invalid.

<sup>c</sup>The first Idylla analysis was invalid (RNA amplification improper/inappropriate). Re-analysis was done using the same tissue block, and the repetition resulted *RET* specific/imb and *ALK* imb simultaneously.

<sup>d</sup>The first Idylla analysis was invalid (RNA amplification improper/inappropriate). Re-analysis was done using two separate tissue blocks, and one resulted *NTRK1* imb and the other one both *NTRK1* imb and *ALK* imb.



**Supplementary Table S3.** Colorectal cancer cases with *NTRK1* fusions analysed by three different RNA-based NGS panels

| <b>Case</b> | <b>FusionPlex Lung v2 NGS<br/>(GRCh37)</b> | <b>FusionPlex CTL NGS<br/>(GRCh37)</b> | <b>TruSight NGS<br/>(GRCh38)</b> |
|-------------|--------------------------------------------|----------------------------------------|----------------------------------|
| 19          | <i>TPM3(e7)::NTRK1(e10)</i>                | <i>TPM3(e7)::NTRK1(e10)</i>            | <i>TPM3(e8)::NTRK1(e10)</i>      |
| 52          | <i>TPM3(e7)::NTRK1(e10)</i>                | <i>TPM3(e7)::NTRK1(e10)</i>            | Not determined                   |
| 30          | <i>LMNA(e5)::NTRK1(e11)</i>                | <i>LMNA(e5)::NTRK1 (e11)</i>           | <i>LMNA(e4)::NTRK1(e11)</i>      |
| 36          | <i>LMNA(e4)::NTRK1(e10)</i>                | <i>LMNA(e4)::NTRK1(e10)</i>            | <i>LMNA(e4)::NTRK1(e10)</i>      |
| 25          | <i>PLEKHA6(e21)::NTRK1(e10)</i>            | <i>PLEKHA6(e21)::NTRK1(e10)</i>        | <i>PLEKHA6(e21)::NTRK1(e10)</i>  |
| 50          | <i>PLEKHA6(e21)::NTRK1(e10)</i>            | <i>PLEKHA6(e21)::NTRK1(e10)</i>        | <i>PLEKHA6(e21)::NTRK1(e10)</i>  |
| 59          | <i>IRF2BP2(e1)::NTRK1(e10)</i>             | <i>IRF2BP2(e1)::NTRK1(e10)</i>         | <i>IRF2BP2(e1)::NTRK1(e10)</i>   |

CTL: Comprehensive Thyroid and Lung, GRC: Genome Reference Consortium, NGS: next-generation sequencing

**Supplementary Table S4.** Comparison of clinicopathological characteristics of fusion positive and fusion negative deficient *MLH1/BRAFV600E* wild-type CRCs (n=62)

|                             |                | Fusion (n=20) | No fusion (n=42) | P-value <sup>a</sup> |
|-----------------------------|----------------|---------------|------------------|----------------------|
| Age (years)                 | Median (range) | 72 (51-90)    | 70 (36-91)       | 0.05                 |
|                             |                |               |                  |                      |
| Sex                         | Female         | 13 (65.0%)    | 24 (57.1%)       | 0.17                 |
|                             | Male           | 7 (35.0%)     | 18 (42.9%)       |                      |
|                             |                |               |                  |                      |
| Tumour site                 | Left colon     | 1 (5.0%)      | 8 (19.0%)        | 0.25                 |
|                             | Right colon    | 19 (95%)      | 34 (81.0%)       |                      |
|                             |                |               |                  |                      |
| Grade                       | Low-grade      | 14 (70.0%)    | 29 (69.0%)       | 1.00                 |
|                             | High-grade     | 6 (30.0%)     | 13 (31.0%)       |                      |
|                             |                |               |                  |                      |
| pT                          | T1-T2          | 5 (25.0%)     | 8 (19.0%)        | 0.74                 |
|                             | T3-T4          | 15 (75.0%)    | 34 (81.0%)       |                      |
|                             |                |               |                  |                      |
| pN                          | N0             | 12 (60.0%)    | 28 (66.7%)       | 0.78                 |
|                             | N1-N2          | 8 (40.0%)     | 14 (33.3%)       |                      |
|                             |                |               |                  |                      |
| M                           | M0             | 16 (80.0%)    | 34 (81.0%)       | 1.00                 |
|                             | M1             | 4 (20.0%)     | 8 (19.0%)        |                      |
|                             |                |               |                  |                      |
| <i>MLH1</i> ph <sup>b</sup> | Present        | 20 (100%)     | 23 (56.1%)       | 0.0002               |
|                             | Absent         | 0 (0.0%)      | 18 (43.9%)       |                      |
|                             |                |               |                  |                      |
| RAS mutation                | Present        | 0 (0.0%)      | 23 (54.8%)       | <0.0001              |
|                             | Absent         | 20 (100%)     | 19 (45.2%)       |                      |

CRC: colorectal cancer, T: tumour, N: nodes, M: metastases, ph: promoter hypermethylation

<sup>a</sup>Mann-Whitney U-test (numerical variables) or Fisher's exact test (categorical variables).

<sup>b</sup>One fusion negative case (#11) was not available for the analysis and thus n=61.
